# Supplementary material for: Synergetic combination of a mesoporous polymeric acid and a base enables highly efficient heterogeneous catalytic one-pot conversion of crude Jatropha oil into biodiesel
Source: Royal Society of Chemistry journal article supplement (doi:10.1039/c9gc04135d), 2020-01-01
Supplement: c9gc04135d1.pdf [file c9gc04135d1.pdf]

## Supplementary Materials

### **Synergetic combination of mesoporous polymeric acid and base enables heterogeneous catalytic one-pot highly efficient conversion of crude *Jatropha* oil into biodiesel**

Hu Pan <sup>a,b</sup>, Yanan Liu <sup>b</sup>, Qineng Xia <sup>b,\*</sup>, Heng Zhang <sup>a</sup>, Li Guo <sup>c</sup>, Hu Li <sup>a,\*</sup>, Lingchang Jiang <sup>b</sup>, Song Yang <sup>a,\*</sup>

<sup>a</sup> State Key Laboratory Breeding Base of Green Pesticide & Agricultural Bioengineering, Key Laboratory of Green Pesticide & Agricultural Bioengineering, Ministry of Education, State-Local Joint Laboratory for Comprehensive Utilization of Biomass, Center for Research & Development of Fine Chemicals, Guizhou University, Guiyang, Guizhou 550025, China

<sup>b</sup> College of Biological, Chemical Science and Engineering, Jiaying University, Jiaying, Zhejiang 314001, China

<sup>c</sup> Key Laboratory of Hubei Province for Coal Conversion and New Carbon Materials, School of Chemistry and Chemical Engineering, Wuhan University of Science and Technology, Wuhan, Hubei 430081, China

#### **Corresponding Authors:**

E-mails: jhzx.msm@gmail.com (S Yang), hli13@gzu.edu.cn (H Li); xiaqineng@mail.zjxu.edu.cn (Q Xia); Tel: +86 (851) 88292171, Fax: +86 (851) 88292170.

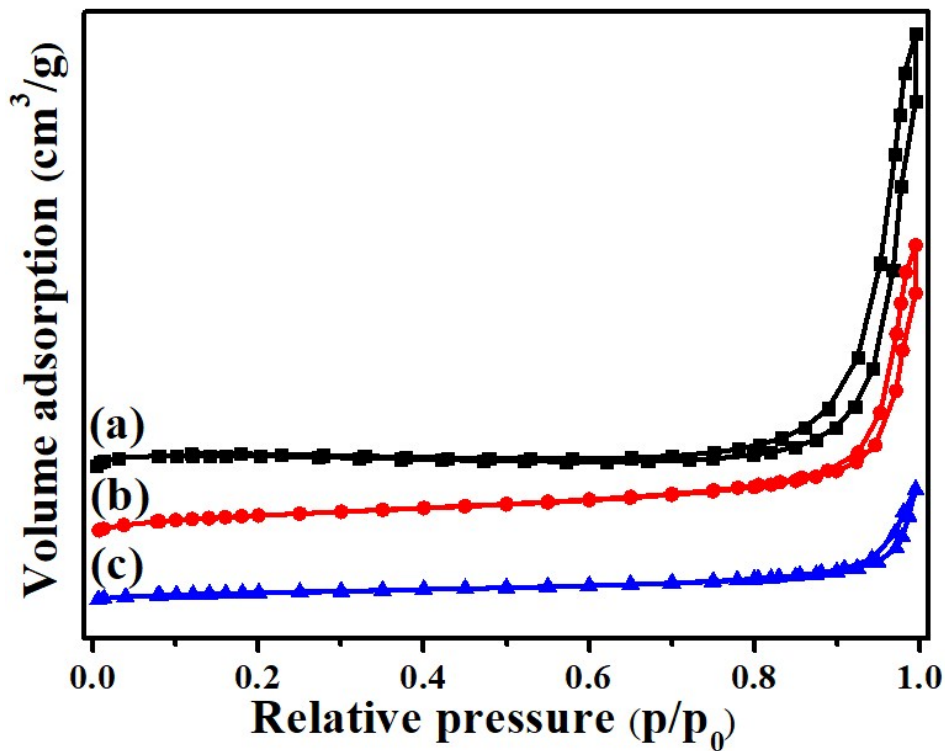

**Fig. S1.** N<sub>2</sub> physisorption isotherms of the MICP(a), MICPOH(b), and MICPHPW(c).

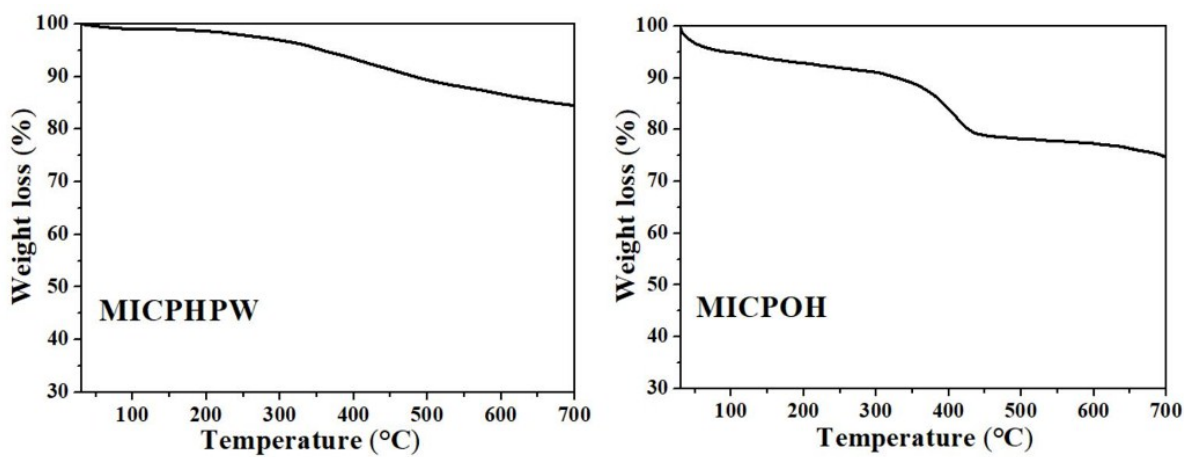

**Fig. S2.** TG curves of the MICPHPW and the MICPOH.

**Table S1** Effect of by-product (i.e., water) of esterification on biodiesel yield.

|            |    |    |    |    |    |
|------------|----|----|----|----|----|
| Acid value | 3  | 8  | 13 | 18 | 23 |
| Yield      | 97 | 95 | 92 | 90 | 87 |

**Table S2**The rate constants and corresponding R<sup>2</sup> coefficients.

| Temperature (°C) | <i>k</i> (1/min) | (R <sup>2</sup> ) |
|------------------|------------------|-------------------|
| 60               | 0.0045           | 0.9812            |
| 70               | 0.0060           | 0.9934            |
| 80               | 0.0080           | 0.9996            |
| 90               | 0.0090           | 0.9835            |

**Table S3**Comparison to *Ea* values of reported catalysts for transesterification.

| Catalyst                                                       | Feedstock           | <i>Ea</i><br>(kJ mol <sup>-1</sup> ) | References |
|----------------------------------------------------------------|---------------------|--------------------------------------|------------|
| Ca/Fe <sub>3</sub> O <sub>4</sub> @SiO <sub>2</sub>            | Sunflower oil       | 47.03                                | [S1]       |
| CaO                                                            | Sunflower oil       | 162.1                                | [S2]       |
| Cs <sub>2.5</sub> PW <sub>12</sub> O <sub>40</sub>             | Vegetable oil       | 114.2                                | [S3]       |
| Fe <sub>3</sub> O <sub>4</sub> @Al <sub>2</sub> O <sub>3</sub> | Waste cooking oil   | 55.5                                 | [S4]       |
| GCS-OH                                                         | Soybean oil         | 76.95                                | [S5]       |
| hydrated lime-derived CaO                                      | Palm oil            | 121.1                                | [S6]       |
| NaOH                                                           | Soybean oil         | 23.7                                 | [S7]       |
| MICPOH                                                         | <i>Jatropha</i> oil | 23.9                                 | This work  |

### **Supporting references:**

- [S1] M. Feyzi, L. Norouzi, Preparation and kinetic study of magnetic Ca/Fe<sub>3</sub>O<sub>4</sub>@SiO<sub>2</sub> nanocatalysts for biodiesel production, *Renew. Energy* 94 (2016) 579-586.
- [S2] D.J. Vujicic, D. Comic, A. Zarubica, R. Micic, G. Boskovic, Kinetics of biodiesel synthesis from sunflower oil over CaO heterogeneous catalyst, *Fuel* 89 (2010) 2054-2061.
- [S3] H.Y. Shin, S.H. An, R. Sheikh, Y.H. Park, S.Y. Bae, Transesterification of used vegetable oils with a Cs-doped heteropolyacid catalyst in supercritical methanol, *Fuel* 96 (2012) 572-578.
- [S4] A. Bayat, M. Baghdadi, G.N. Bidhendi, Tailored magnetic nano-alumina as an efficient catalyst for transesterification of waste cooking oil: Optimization of biodiesel production using response surface methodology, *Energy Convers. Manag.* 177 (2018) 395-405.
- [S5] B. He, Y. Shao, M. Liang, J. Li, Y. Cheng, Biodiesel production from soybean oil by guanidinylated chitosan, *Fuel* 159 (2015) 33-39.
- [S6] W. Roschat, T. Siritanon, B. Yoosuk, V. Promarak, Biodiesel production from palm oil using hydrated lime-derived CaO as a low-cost basic heterogeneous catalyst, *Energy Convers. Manag.* 108 (2016) 459-467.
- [S7] L. Wu, K. Huang, T. Wei, Z. Lin, Y. Zou, Z. Tong, Process intensification of NaOH-catalyzed transesterification for biodiesel production by the use of bentonite and co-solvent (diethyl ether), *Fuel* 186 (2016) 597-604.
